# Supplementary material
Source: HighWire-hosted journal article supplement (https://bmjopen.bmj.com/content/12/2/e052032)
Supplement: inline-supplementary-material-2 [file inline-supplementary-material-2.pdf]

**Supplementary Table 2** APGS Invitations and respondents per state or territory of Australia

| State or Territory           | Letters sent by state | Respondents by state |
|------------------------------|-----------------------|----------------------|
|                              | N (%)                 | N (%)                |
| New South Wales              | 6,220 (31.1%)         | 457 (30.2%)          |
| Victoria                     | 5,020 (25.1%)         | 336 (22.2%)          |
| Queensland                   | 4,220 (21.1%)         | 367 (24.3%)          |
| South Australia              | 1,880 (9.4%)          | 142 (9.4%)           |
| Western Australia            | 1,740 (8.75%)         | 140 (9.3%)           |
| Tasmania                     | 640 (3.2%)            | 35 (2.3%)            |
| Australian Capital Territory | 220 (1.1%)            | 26 (1.7%)            |
| Northern Territory           | 60 (0.3%)             | 9 (0.6%)             |
| TOTAL                        | 20,000 (100%)         | 1,512 (100%)         |
